# Supplementary material for: We Have Eaten the Rivers: The Past, Present, and Unsustainable Future of Hydroelectricity in Vietnam
Source: MDPI journal article supplement (doi:10.3390/su15118969), 2023-06-01
Supplement: s1 [file s1]

Archive with 2 entries (2 files):
- sustainability-2241058-Database.xlsx
- sustainability-2241058-Notes.pdf
