# Supplementary material for: We Have Eaten the Rivers: The Past, Present, and Unsustainable Future of Hydroelectricity in Vietnam
Source: MDPI journal article supplement (doi:10.3390/su15118969), 2023-06-01
Supplement: s1 [file s1 › sustainability-2241058-Database.xlsx]

## Sheet: Operational
Name (English)	Name (Vietnamese)	Peak Installed Capacity (MW)	Year	Class	Latitude, Longitude	Latitude	Longitude	Reported Output (TWh)	Reported of Simulted Output (TWh)
A Lin B1	A Lin B1	42	2019	Medium	16.31253, 107.14948	16.3125	107.149	0.165	0.165			See associated Supplement File "Notes" for clarifications
A Lin B2	A Lin B2	20	2019	Small-L	16.40977, 107.22424	16.4098	107.224	0.07	0.07
A Lin Thuong	A Lin Thượng	3	2021	Small-S	16.34325, 107.13208	16.3433	104.92	ND	0.011802
A Luoi	A Lưới	170	2012	Large	16.198, 107.16319	16.198	107.163	0.649	0.649
A Roang	A Roàng	7.2	2015	Small-S	16.12305, 107.39581	16.123	107.396	0.03	0.03
A Vuong	A Vương	210	2008	Large	15.7998,107.6171	15.7998	107.617	0.737	0.737
A Vuong 3	A Vương 3	4.8	2016	Small-S	15.9212369, 107.5702413	15.9212	107.57	0.025	0.025
An Diem 1	An Điềm 1	5.4	1991	Small-S	15.90196, 107.88171	15.902	107.882	0.025	0.025
An Diem 2	An Điềm 2	15.6	2010	Small-L	15.93349, 107.9035	15.9335	107.903	0.0783	0.0783
An Khe	An Khê	160	2009	Large	14.0148,108.6796	14.0148	108.68	0.64185	0.64185
An Phuoc	An Phước	12	2019	Small-L	11.84832, 108.21122	11.8483	108.211	0.0587	0.0587
Ankroet	Ankroet	4.4	1945	Small-S	11.9921,108.3708	11.9921	108.371	ND	0.017362
Ayun Thuong 1A	Ayun Thượng 1A	12	2011	Small-L	13.9279584, 108.231386	13.928	108.231	0.0498	0.0498
Ayun Trung	Ayun Trung	16.5	2018	Small-L	13.85564, 108.21267	13.8556	108.213	0.048	0.048
Ba Thuoc 1	Bá Thước 1	60	2017	Medium	20.3210039, 105.1717897	20.321	105.172	0.216	0.216
Ba Thuoc 2	Bá Thước 2	80	2013	Medium	20.321, 105.3281	20.321	105.328	0.4	0.4
Bac Binh	Bắc Bình	33	2009	Medium	11.45694, 108.35175	11.4569	107.503	0.09774	0.09774
Bac Cuong	Bắc Cuông	5.75	2019	Small-S	22.28929, 104.47239	22.2893	104.472	ND	0.022737
Bac Me	Bắc Mê	45	2017	Medium	22.738328, 105.403696	22.7383	105.404	0.197	0.197
Bac Na	Bắc Nà	17	2016	Small-L	22.508208, 104.3364649	22.5082	104.336	0.07	0.07
Bac Na 1	Bắc Nà 1	2.8	2020	Small-S	22.5176311, 104.3322535	22.5176	104.332	ND	0.0110092
Bach Dang	Bạch Đằng	5	2021	Small-S	22.59881, 106.1681	22.5988	106.168	0.017	0.017
Ban Ang	Bản Ang	17	2017	Small-L	19.2551668, 104.4005764	19.2552	104.401	0.07	0.07
Ban Canh	Bản Cánh	1.5	2013	Small-S	19.39919, 104.11587	19.3992	104.116	ND	0.00586877
Ban Chat	Bản Chát	220	2013	Large	21.8612,103.8286	21.8612	103.829	1.158	1.158
Ban Coc	Bản Cốc	18	2009	Small-L	19.6053,104.859	19.6053	104.859	0.08	0.08
Ban Quyen	Bản Quyền	1.1	1968	Small-S	21.87797, 106.55101	21.878	106.551	ND	0.00429323
Ban Ra	Bản Rạ	18	2012	Small-L	22.8602654, 106.6892857	22.8603	106.689	0.07	0.07
Ban Thach	Bàn Thạch	3	1961	Small-S	19.90837, 105.52657	19.9084	105.527	ND	0.011802
Ban Ve	Bản Vẽ	320	2010	Very Large	19.34558, 104.48335	19.3456	104.483	1.0842	1.0842
Ban Xeo	Bản Xèo	2.8	2019	Small-S	22.53044, 103.74705	22.5304	103.747	ND	0.0110092
Bao Lac B	Bảo Lạc B	18	2020	Small-L	22.95226, 105.59784	22.9523	105.598	0.112	0.112
Bao Lam 1	Bảo Lâm I	30	2016	Medium	22.94179, 105.54912	22.9418	105.549	ND	0.120186
Bao Lam 3	Bảo Lâm 3	46	2018	Medium	23.01278, 105.48976	23.0128	105.49	0.1922	0.1922
Bao Lam 3A	Bảo Lâm 3A	8	2018	Small-L	22.97682, 105.51941	22.9768	105.519	0.03342	0.03342
Bao Loc	Bảo Lộc	24.5	2009	Small-L	11.42205, 107.87536	11.4221	107.875	0.1286	0.1286
Bao Nhai Bac 1	Bảo Nhai Bậc 1	14	2021	Small-L	22.4509506, 104.2425689	22.451	104.243	ND	0.0557503
Bao Nhai Bac 2	Bảo Nhai Bậc 2	14.5	2022	Small-L	22.42326, 104.26107	22.4233	104.261	ND	0.0577574
Binh Dien	Bình Điền	44	2009	Medium	16.3172,107.5028	16.3172	107.503	0.181656	0.181656
Binh Long	Bình Long	6.5	2021	Small-S	22.73475, 106.12062	22.7347	106.121	0.0209	0.0209
Bu Ca Mau	Bù Cà Mau	4	2009	Small-S	11.8713,106.9768	11.8713	106.977	0.0125	0.0125
Buon Kuop	Buôn Kuốp	280	2011	Large	12.5305,107.9243	12.5305	107.924	1.455	1.455
Buon Tua Srah	Buôn Tua Srah	86	2009	Medium	12.2852,108.0383	12.2852	107.832	0.359	0.359
Ca Du	Cà Đú	2.6	2005	Small-S	15.2772735, 108.5195441	15.2773	108.52	0.01	0.01
Ca Nan 1	Ca Nan 1	7	2019	Small-S	19.27267, 104.16983	19.2727	104.17	ND	0.0277229
Ca Nan 2	Ca Nan 2	16	2019	Small-L	19.33834, 104.29373	19.3383	104.294	ND	0.0637819
Cam Son	Cấm Sơn	3.9	1974	Small-S	21.5438,106.5105	21.5438	106.51	ND	0.0153744
Cam Thuy 1	Cẩm Thủy 1	28.6	2016	Small-L	20.236849, 105.406043	20.2368	105.406	0.138	0.138
Can Don	Cần Đơn	77.6	2004	Medium	11.9689,106.8435	11.9689	106.844	0.3212	0.3212
Chau Thang	Châu Thắng	14	2017	Small-L	19.6007688, 104.9996191	19.6008	105	ND	0.0557503
Chau Thon	Châu Thôn	27	2012	Small-L	19.6073608, 104.7884264	19.6074	104.788	0.07581	0.07581
Chi Khe	Chi Khê	41	2017	Medium	19.08821, 104.80287	21.7136	103.215	0.191	0.191
Chiem Hoa	Chiêm Hóa	48	2013	Medium	22.1965255, 105.3290481	22.1965	105.329	0.1986	0.1986
Chieng Cong 1	Chiềng Công 1	6.4	2011	Small-S	21.4707, 104.1852	21.4707	104.185	ND	0.0253287
Chieng Cong 2	Chiềng Công 2	5.25	2010	Small-S	21.45291, 104.18129	21.4529	104.181	ND	0.020745
Chieng Khoa	Chiềng Khoa	2.5	2012	Small-S	20.8421, 104.83731	20.8421	104.876	ND	0.00982083
Chieng Muon	Chiềng Muôn	10	2022	Small-L	21.51817, 104.11866	21.5182	104.119	ND	0.0397159
Chieng Ngam	Chiềng Ngàm	1.26	1977	Small-S	21.4796461, 103.7810818	21.4796	103.781	ND	0.00492298
Chieng Ngam Thuong	Chiềng Ngàm Thượng	10	2012	Small-L	21.4674944, 103.7728027	21.4675	103.773	0.041	0.041
Chu Pong Krong	Chư Pông Krông	8	2020	Small-L	12.29721, 107.97425	12.2972	107.974	ND	0.0317168
Chu Prong	Chư Prông	3.75	2013	Small-S	13.96462, 107.76671	13.9646	107.767	ND	0.0147785
Coc Dam	Cốc Đàm	7.5	2011	Small-S	22.4143775, 104.3176132	22.4144	104.318	0.04	0.04
Coc Ly	Cốc Ly	90	2012	Medium	22.50658, 104.1967243	22.5066	104.197	0.378	0.378
Coc San	Cốc San	29.7	2016	Small-L	22.4144,103.9066	20.5896	104.907	0.12	0.12
Coc San Ha	Cốc San Hạ	7.5	2019	Small-S	22.4410672, 103.9460617	22.4411	103.946	ND	0.0297193
Cua Dat	Cửa Đạt	97	2010	Medium	19.8782,105.2731	19.8782	105.273	0.43	0.43
Da Br'len	Đa Br'len	7	2019	Small-S	11.57024, 107.73534	11.5702	107.735	ND	0.0277229
Da Dang 2	Đạ Dâng 2	34	2010	Medium	11.722359, 108.2458637	11.7224	108.246	0.15211	0.15211
Da Dang 3	Đa Dâng 3	12	2016	Small-L	11.6673, 108.23353	11.6673	108.234	ND	0.0477278
Da Den	Đá Đen	9	2011	Small-L	12.89364, 109.15478	12.8936	109.155	0.03	0.03
Da Kai	Đa Kai	6	2013	Small-S	11.773133, 107.824099	11.7731	107.824	0.024	0.024
Da Khai	Đa Khai	8.1	2009	Small-L	12.08479, 108.59472	12.0848	108.595	0.0385	0.0385
Da M'bri	Đa M'bri	75	2014	Medium	11.5827,107.6726	11.5827	107.673	0.3382	0.3382
Da M'bri 1	Đa M'bri 1	7.5	2019	Small-S	11.63651, 107.73367	11.6365	107.734	0.03045	0.03045
Da Mi	Đa Mi	175	2001	Large	11.24019, 107.83804	11.2402	107.838	0.558	0.558
Da Nhim	Đa Nhim	160	1964	Large	11.8529,108.6058	11.8529	108.606	0.935	0.935
Da Nhim	Đa Nhim Exp 1	80	2021	Medium	11.8455, 108.656	11.8455	108.656	0.38	0.38
Da Nhim Thuong 2	Đa Nhim Thượng 2	7.5	2010	Small-S	12.06901, 108.61687	12.069	108.617	0.032	0.032
Da Siat	Đa Siat	13.5	2009	Small-L	11.83157, 107.64547	11.8316	107.645	0.06	0.06
Da Trou Kea	Đa Trou Kea	4.5	2018	Small-S	11.55306, 108.01509	11.5531	108.015	ND	0.0177598
Dai Dong	Đại Đồng	0.6	2010	Small-S	15.87861, 108.02093	15.8786	108.021	ND	0.00233058
Dai Nga	Đại Nga	10	2015	Small-L	11.5156311, 107.8667286	11.5156	107.867	0.04372	0.04372
Dai Ninh	Đại Ninh	300	2008	Very Large	11.6499,108.3202	11.6499	108.32	1.2	1.2
Dak Bla 1	Đắk Bla 1	27	2018	Small-L	14.4306398, 108.1435467	14.4306	108.144	0.0616	0.0616
Dak Ble	Đăk Ble	5	2019	Small-S	14.38102, 108.43695	14.381	108.437	0.021	0.021
Dak Doa	Đak Đoa	14	2010	Small-L	14.1847,108.1064	14.1847	108.106	0.048	0.048
Dak Drinh	Đak Đrinh	125	2013	Large	14.97827, 108.3017	14.9783	108.302	0.52	0.52
Dak Glun 1	Đak Glun 1	18	2011	Small-L	12.0252,107.1834	12.0252	107.183	0.07581	0.07581
Dak Glun 2	Đăk Glun 2	12.6	2022	Small-L	12.00346, 107.16816	12.0035	107.168	ND	0.0501335
Dak Gret	Đăk Grét	3.6	2011	Small-S	14.59126, 108.12288	14.5913	108.123	ND	0.0141828
Dak Hnol	Đăk Hnol	2.1	2010	Small-S	13.9314061, 108.2169985	13.9314	108.217	0.00819	0.00819
Dak Kar	Đắk Kar	12	2020	Small-L	11.84446, 107.42174	11.8445	107.422	ND	0.0477278
Dak Lay	Đăk Lây	3.2	2016	Small-S	14.93398, 107.9975	14.934	107.998	ND	0.0125952
Dak Lo 1	Đăk Lồ 1	6	2016	Small-S	14.72808, 108.36947	14.7281	108.369	ND	0.0237336
Dak Lo 2	Đăk Lồ 2	6	2016	Small-S	14.7742, 108.39491	14.7742	108.395	ND	0.0237336
Dak Lo 3	Đăk Lồ 3	10	2016	Small-L	14.731526, 108.3278043	14.7315	108.328	0.04372	0.04372
Dak Me 1	Đắk Mê 1	5	2011	Small-S	12.1333,108.313	12.1333	108.313	0.025	0.025
Dak Mi 2	Đắk Mi 2	98	2019	Medium	15.22831, 107.81561	15.2283	107.816	0.415	0.415
Dak Mi 3	Đăk Mi 3	63	2017	Medium	15.31908, 107.82557	15.3191	107.826	0.2119	0.2119
Dak Mi 4A	Đăk Mi 4A	148	2012	Large	15.45329, 107.83154	15.4533	107.832	0.58934	0.58934
Dak Mi 4B	Đăk Mi 4B	42	2012	Medium	15.45897, 107.91243	15.459	107.832	0.16317	0.16317
Dak Mi 4C	Đăk Mi 4C	18	2012	Small-L	15.4642, 107.929	15.4642	107.929	0.0691	0.0691
Dak Ne	Đăk Ne	8.1	2010	Small-L	14.5281,108.2191	14.5281	108.219	0.03796	0.03796
Dak Nong	Đăk Nông	8	2010	Small-L	12.18328, 107.60677	12.1833	107.607	ND	0.0317168
Dak Nong 2	Đăk Nông 2	16	2016	Small-L	11.95923, 107.66404	11.9592	107.664	0.065	0.065
Dak N'teng	Đăk N'Teng	13	2011	Small-L	12.1958,107.9268	12.1958	107.927	ND	0.0517378
Dak Pi Hao 1	Đăk Pi Hao 1	5	2020	Small-S	13.7672201, 108.3413181	13.7672	108.341	ND	0.0197495
Dak Pi Hao 2	Đăk Pi Hao 2	9	2016	Small-L	13.7096952, 108.4252558	13.7097	108.425	ND	0.0357146
Dak Pia	Đăk Pia	2.2	2012	Small-S	14.66511, 108.15936	14.6651	108.159	0.009111	0.009111
Dak Piu 2	Đăk Piu 2	4	2022	Small-S	14.85139, 107.72009	14.8514	107.72	ND	0.0157718
Dak Po Ko	Đăk Pô Kô	15	2018	Small-L	14.6443641, 107.8095747	14.6444	107.81	0.066	0.066
Dak Po Ne 1A	Đăk Pô Ne 1A	14	2009	Small-L	14.5759,108.3049	14.5759	108.305	ND	0.0557503
Dak Po Ne 1B	Đăk Pô Ne 1B	1.6	2009	Small-S	14.56314, 108.30588	14.5631	108.306	ND	0.00626321
Dak Po Ne 2	Đăk Pô Ne 2	3.6	2009	Small-S	14.52423, 108.30065	14.5242	108.301	0.01578	0.01578
Dak Pring	Đăk Pring	7.5	2017	Small-S	15.63018, 107.55698	15.6302	107.557	0.03045	0.03045
Dak Pru 1	Đăk Pru 1	7	2018	Small-S	15.05185, 107.68068	15.0518	107.681	0.03	0.03
Dak Psi 1	Đắk Psi 1	4	2018	Small-S	14.93624, 107.94276	14.9362	107.943	ND	0.0157718
Dak Psi 2B	Đắk Psi 2B	14	2018	Small-L	14.86371, 108.01378	14.8637	108.014	0.052	0.052
Dak Psi 3	Đắk Psi 3	15	2012	Small-L	14.79797, 108.0078	14.798	108.008	0.06	0.06
Dak Psi 4	Đắk Psi 4	30	2012	Medium	14.7685609, 108.0029081	14.7686	108.003	0.115	0.115
Dak Psi 5	Đắk Psi 5	10	2014	Small-L	14.6613, 107.9367	14.6613	107.937	0.0484	0.0484
Dak Re	Đăk Re	60	2019	Medium	14.60551, 108.48294	14.6055	108.483	0.27	0.27
Dak Ro Ong	Đăk Rơ Ông	15	2012	Small-L	14.83976, 107.89326	14.8398	107.893	0.081	0.081
Dak Ro Sa 1	Đăk Rơ Sa 1	7.5	2007	Small-S	14.7473,107.8358	14.7473	107.836	0.033	0.033
Dak Ro Sa 2	Đăk Rơ Sa 2	2.4	2012	Small-S	14.7135,107.8211	14.7135	107.821	0.00919	0.00919
Dak R'Tih Lower	Đắk R'Tíh - bậc dướ	62	2011	Medium	11.913306, 107.6721954	11.9133	107.672	0.264404	0.264404
Dak R'Tih Upper	Đắk R'Tíh bậc trên	82	2011	Medium	11.9902, 107.6597	11.9902	107.66	0.349696	0.349696
Dak Ru	Đắk Ru	15	2008	Small-S	11.8951595, 107.4162881	11.8952	107.416	0.03	0.03
Dak Rung	Đăk Rung	8	2009	Small-L	12.1635, 107.63099	12.1635	107.631	ND	0.0317168
Dak Rung 1	Đak Rung 1	6	2010	Small-S	12.12765, 107.63608	12.1276	107.636	ND	0.0237336
Dak Sa	Đăk Sa	1.6	2015	Small-S	15.4175746, 107.7814604	15.4176	107.781	ND	0.00626321
Dak Sin 1	Đắk Sin 1	28	2015	Small-L	11.8186,107.459	11.8186	107.459	0.105618	0.105618
Dak Srong	Đăk Srông	18	2010	Small-L	13.7659,108.5236	13.7659	108.524	0.07867	0.07867
Dak Srong 2	Đăk Srông 2	24	2010	Small-L	13.69652, 108.56208	13.6786	108.565	0.09369	0.09369
Dak Srong 2A	Đăk Srông 2A	18	2011	Small-L	13.6788711, 108.5644529	13.6789	108.564	0.058	0.058
Dak Srong 3A	Đăk Srông 3A	10	2014	Small-L	13.3473,108.5323	13.3473	108.532	0.03731	0.03731
Dak Srong 3B	Đăk Srông 3B	20	2012	Small-L	13.3381,108.5587	13.3381	108.559	0.07507	0.07507
Dak Ter 1	Đăk Ter 1	3.6	2015	Small-S	14.76882, 107.94621	14.7688	107.946	ND	0.0141828
Dak Ter 2	Đăk Ter 2	3.4	2015	Small-S	14.75078, 107.97563	14.7508	107.976	ND	0.0133888
Đăk U	Đăk U	2.4	2009	Small-S	11.9977855, 107.0072206	11.9978	107.007	ND	0.00942496
Dak Xu	Đắk Xú	3	2016	Small-S	14.73188, 107.6384	14.7319	107.638	ND	0.011802
Dakrong 1	Đakrông 1	12	2019	Small-L	16.49448, 106.97172	16.4945	106.972	0.04565	0.04565
Dakrong 2	Đakrông 2	18	2013	Small-L	16.64871, 106.81677	16.6487	106.817	ND	0.0718214
Dakrong 3	Đakrông 3	8	2012	Small-L	16.56032, 106.95376	16.5603	106.954	ND	0.0317168
Dakrong 4	Đakrông 4	28	2019	Small-L	16.5962411, 106.8819869	16.5962	106.882	0.085	0.085
Dambol	Đam Bor – Đạ Tẻh	10.2	2011	Small-L	11.7093476, 107.6453514	11.7093	107.645	0.044	0.044
Dan Sach 1	Đan Sách 1	6	2015	Small-S	11.26469, 108.00082	11.2647	108.001	ND	0.0237336
Dan Sach 2	Đan Sách 2	4	2015	Small-S	11.23876, 108.01136	11.2388	108.011	ND	0.0157718
Dan Sach 3	Đan Sách 3	1	2015	Small-S	11.22832, 108.01929	11.2283	108.019	ND	0.0039
Dinh Cu	Định Cư	1.05	2011	Small-S	20.46341, 105.40626	20.4634	105.406	ND	0.00409658
Doc Cay	Dốc Cáy	15	2013	Small-L	19.95702, 105.26658	19.957	105.267	ND	0.059765
Dong Chum 2A	Đồng Chum 2A	5.6	2013	Small-S	20.96157, 104.9609	20.9616	104.961	0.0182498	0.0182498
Dong Chum 2B	Đồng Chum 2B	3.4	2013	Small-S	20.95146, 104.98721	20.9515	104.987	0.0110802	0.0110802
Dong Khua	Đông Khùa	2.1	2017	Small-S	20.95892, 104.42003	20.9589	104.42	0.007	0.007
Dong Nai 2	Đồng Nai 2	70	2015	Medium	11.7129,108.0579	11.7129	108.058	0.2638	0.2638
Dong Nai 3	Đồng Nai 3	180	2012	Large	11.8722,107.8887	11.8722	107.889	0.6071	0.6071
Dong Nai 4	Đồng Nai 4	340	2012	Very Large	11.8851,107.7286	11.8851	107.729	1.1095	1.1095
Dong Nai 5	Đồng Nai 5	150	2015	Large	11.7927,107.5534	11.7927	107.553	0.616	0.616
Dong Pao	Đông Pao	7.6	2021	Small-S	22.29284, 103.55532	22.2928	103.555	0.028185	0.028185
Dong Sung	Đồng Sung	20	2019	Small-L	21.8138, 104.65832	21.8138	104.658	0.068	0.068
Dong Van	Đồng Văn	28	2016	Small-L	19.8911, 105.132	19.8911	105.132	0.12	0.12
Dray H'Linh 1	Đray H'linh 1	12	1990	Small-L	12.6712,107.9075	12.6712	107.907	ND	0.0477278
Dray H'Linh 2	Đray H'linh 2	16	2007	Small-L	12.6757,107.9041	12.6757	107.904	0.077	0.077
Dray H'Linh 3	Đray H'linh 3	6	2008	Small-S	12.67255, 107.90848	12.6725	107.908	ND	0.0237336
Duy Son	Duy Sơn	0.8	1982	Small-S	15.77417, 108.21455	15.7742	108.215	ND	0.0031145
Duy Son II	Duy Sơn II	2.1	1982	Small-S	15.78631, 108.22362	15.7863	108.224	ND	0.00823815
Ea Drang 2a	Ea Đrăng 2a	3.2	2011	Small-S	13.2391864, 108.0615692	13.2392	108.062	ND	0.0125952
Ea Drang 2b	Ea Đrăng 2b	3.2	2011	Small-S	13.2509563, 108.0522169	13.251	108.052	ND	0.0125952
Ea Kar	Ea Kar	3	2012	Small-S	12.78944, 108.4541	12.7894	108.454	ND	0.011802
Ea Krong Rou	Ea Krông Rou	28	2007	Small-L	12.5992,108.9397	12.5992	108.94	0.12	0.12
Ea M'Doal 2	Ea M'Doal 2	5	2010	Small-S	12.7743715, 108.8813257	12.7744	108.881	0.029	0.029
Ea M'Doal 3	Ea M'Doal 3	5	2010	Small-S	12.7999,108.9287	12.7999	108.929	ND	0.0197495
Ea Sup 3	Ea Súp 3	6.4	2012	Small-S	13.06581, 108.07741	13.0658	108.077	ND	0.0253287
Ea Tul 4	Ea Tul 4	6	2011	Small-S	12.8010398, 107.9487768	12.801	107.949	ND	0.0237336
Ha Nang	Hà Nang	11	2011	Small-L	15.2904606, 108.4908877	15.2905	108.491	0.067	0.067
Ha Rao Quan	Hạ Rào Quán	6.4	2011	Small-S	16.64672, 106.76996	16.6467	106.77	0.0242	0.0242
Ha Song Pha 1	Hạ Sông Pha 1	5.4	2013	Small-S	11.8284,108.6906	11.8284	108.691	0.032	0.032
Ha Song Pha 2	Hạ Sông Pha 2	5.1	2015	Small-S	11.83208, 108.70822	11.8321	108.708	ND	0.0201477
Ha Tay	Hà Tây	9	2015	Small-L	14.2389286, 108.1053547	14.2389	108.105	0.03756	0.03756
Ham Thuen	Hàm Thuận	300	2001	Very Large	11.3301, 107.93247	11.3301	107.932	1.11	1.11
Hang Dong A	Háng Đồng A	16	2014	Small-L	21.31308, 104.47649	21.3131	104.476	0.055	0.055
Hang Dong A1	Háng Đồng A1	8.4	2014	Small-L	21.28722, 104.47857	21.2872	104.479	0.03077	0.03077
Hat Liu	Hát Lìu	5	2014	Small-S	21.50845, 104.35748	21.5084	104.357	0.0177	0.0177
H'Chan	H'Chan	12	2007	Small-L	13.8355538, 108.178618	13.8356	108.179	ND	0.0477278
H'mun	H'mun	16.3	2011	Small-L	13.8099238, 108.1637937	13.8099	108.164	0.066	0.066
Hồ Bien Ho	Biển Hồ	0.225	2016	Small-S	14.0581, 108.0032	14.0581	108.003	ND	0.00086722
Ho Ayun Ha	Hồ Ayun Hạ	3	2001	Small-S	13.5809,108.2592	13.5809	104.92	0.021	0.021
Ho Bon	Hồ Bốn	18	2012	Small-L	21.87787, 103.94189	21.8779	103.942	0.072	0.072
Ho Dinh Binh	Hồ Định Bình	9.9	2008	Small-L	14.1565,108.7727	14.1565	108.773	0.0375837	0.0375837
Ho Ho	Hố Hô	14	2010	Small-L	18.0464,105.8334	18.0464	105.833	0.035	0.035
Ho Nui Coc	Hồ Núi Cốc	1.89	2009	Small-S	21.5565,105.73	21.5565	105.73	0.008	0.008
Ho Phu Ninh	Hồ Phú Ninh	1.2	1980	Small-S	15.5070676, 108.4643755	15.5071	108.464	0.0033	0.0033
Ho Song Cho 1	Sông Chò 1	7	2018	Small-S	12.44253, 108.9144	12.4425	108.914	ND	0.0277229
Hoa Binh	Hòa Bình	1920	1994	Mega	20.8082,105.3233	20.8082	105.323	8.259	8.259
Hoa Phu	Hoà Phú	29	2014	Small-L	12.6497,107.9091	12.6497	107.909	0.1325	0.1325
Hoa Thuan	Hòa Thuận	17.4	2019	Small-L	22.54195, 106.49853	22.5419	106.499	ND	0.0694087
Hoi Xuan	Hồi Xuân	102	2020	Large	20.44498, 105.05295	20.445	105.053	0.425	0.425
Hua Chang	Hua Chăng	10.2	2017	Small-L	22.18051, 103.79125	22.1805	103.791	0.037755	0.037755
Hua Na	Hủa Na	180	2013	Large	19.8381,105.0846	19.8381	105.085	0.717	0.717
Hung Kannh	Hưng Khánh	0.25	2012	Small-S	21.59982, 104.76699	21.5998	104.767	ND	0.00096438
Huoi Chan 1	Huổi Chan 1	15	2020	Small-L	21.60537, 103.02282	21.6054	103.023	0.058	0.058
Huoi Quang	Huội Quảng	520	2016	Very Large	21.6965,103.8776	21.6965	103.878	1.9	1.9
Huoi Vang	Huổi Vang	11	2021	Small-L	21.65057, 103.04818	21.6506	103.048	ND	0.0437204
Huong Dien	Hương Điền	81	2010	Medium	16.4601,107.4233	16.4601	107.423	ND	0.327059
Huong Son 1	Hương Sơn 1	33	2012	Medium	18.446,105.1513	18.446	105.151	ND	0.132305
Huy Mang	Huy Măng	1.8	2015	Small-S	15.00181, 108.3408	15.0018	108.341	ND	0.00705267
Ia Drang 1	Ia Đrăng 1	0.6	2002	Small-S	13.7735, 107.89479	13.7735	107.895	ND	0.00233058
Ia Drang 2	Ia Drăng 2	1.2	1989	Small-S	13.7389,107.8508	13.7389	107.851	ND	0.00468675
Ia Drang 3	Ia Drăng 3	1.6	2005	Small-S	13.67641, 107.77942	13.6764	107.779	ND	0.00626321
Ia Grai 1	Ia Grai 1	10.8	2012	Small-L	13.9757, 107.7278	13.9757	107.728	ND	0.0429193
Ia Grai 2	Ia Grai 2	7.5	2014	Small-S	13.97602, 107.68867	13.976	107.691	ND	0.0297193
Ia Grai 3	Ia Grai 3	7.5	2007	Small-S	14.0222003, 107.6493618	14.0222	107.649	0.04	0.04
Ia H'rung	Ia H'rung	4.5	2013	Small-S	13.97552, 107.79289	13.9755	107.793	ND	0.0177598
Ia Krel 2	Ia Krel	5.5	2010	Small-S	13.83679, 107.65458	13.8368	107.655	ND	0.0217408
Ia Lop	Ia Lốp	0.25	1993	Small-S	13.4139123, 107.8292686	13.4139	107.829	ND	0.00096438
Ia Ly (Yali Falls)	Ialy	720	2002	Very Large	14.2274,107.8294	14.2274	107.829	3.7	3.7
Ia Meur 3	Ia Meur 3	1.8	2005	Small-S	13.6679352, 107.8179317	13.6679	107.818	ND	0.00705267
Ia Puch 3	Ia Púch 3	6.6	2009	Small-S	13.73247, 107.80473	13.7325	107.805	ND	0.0261266
Kanak	Ka Nak	13	2005	Small-L	14.1751917, 108.57728	14.1752	108.577	ND	0.0517378
K'Dang- E40	K'Dang	0.2	2012	Small-S	13.988381, 108.3937103	13.9884	108.394	ND	0.000770145
Ke Go	Kẻ Gỗ	2.3	1988	Small-S	18.1953,105.928	18.1953	105.928	ND	0.00902922
Ken Lut Ha	Ken Lút Hạ	6	2019	Small-S	14.2173103, 108.734969	14.2173	108.735	0.022	0.022
Khanh Khe	Khánh Khê	7	2021	Small-S	21.87647, 106.6576	21.8765	106.658	ND	0.0277229
Khao Mang 1	Khao Mang 1	30	2017	Medium	21.85914, 104.03573	21.8591	104.036	0.097	0.097
Khao Mang Thuong	Khao Mang Thượng	24.5	2015	Small-L	21.86771, 103.99997	21.8677	104	0.071	0.071
Khe Bo	Khe Bố	100	2013	Large	19.1812298, 104.6638294	19.1812	104.664	0.4428	0.4428
Khe Dien	Khe Diên	9	2007	Small-L	15.6882743, 107.9434311	15.6883	107.943	0.04	0.04
Khe Giong	Khe Giông	4.5	2020	Small-S	16.59259, 106.79799	16.5926	106.798	0.01784	0.01784
Khe Nghi	Khe Nghi	8	2016	Small-L	16.7044, 106.77869	16.7044	106.779	ND	0.0317168
Khe Ron	Khe Rôn	6	2009	Small-S	17.9168,105.9706	17.9168	105.971	ND	0.0237336
Khe Soong	Khe Soong	3.6	2008	Small-S	21.3645352, 107.3819321	21.3645	107.382	ND	0.0141828
Khe Thoi	Khe Thơi	12	2022	Small-L	19.11303, 104.71954	19.113	104.72	ND	0.0477278
Kon Dao	Kon Đào	1	1989	Small-S	14.6967,107.8258	14.6967	107.826	ND	0.0039
Krong Hin	Krông Hin	5	2006	Small-S	12.74553, 108.86456	12.7455	108.865	0.03	0.03
Krong H'Nang	Krông H'Năng	64	2011	Medium	12.9568533, 108.707088	12.9569	108.707	0.25	0.25
Krong Kmar	Krông Kmar	12	2009	Small-L	12.452,108.3372	12.452	108.337	0.075	0.075
Krong No 2	Krông Nô 2	30	2017	Medium	12.25492, 108.35524	12.2549	108.355	0.10587	0.10587
Krong No 3	Krông Nô 3	18	2016	Small-L	12.2117,108.2847	12.2117	108.285	0.065	0.065
Krong Pa 2	Krông Pa 2	5.8	2016	Small-S	14.40641, 108.43367	14.4064	108.434	ND	0.0229363
La Hieng 2	La Hiêng 2	18	2015	Small-L	13.5017, 108.84811	13.5017	108.848	0.06812	0.06812
La La	La La	3	2019	Small-S	16.60799, 106.68643	16.608	106.686	ND	0.011802
La To	La Tó	12.6	2020	Small-L	12.00346, 107.16816	16.5068	107.005	0.0443	0.0443
Lai Chau	Lai Châu	1200	2016	Mega	22.1379,102.9839	22.1379	102.984	7.24	7.24
Lang Bang	Làng Bằng	3.6	2010	Small-S	21.9044, 104.53154	21.9044	104.532	ND	0.0141828
Lao Chai	Lao Chải	2.4	2013	Small-S	22.31054, 103.87448	22.3105	103.874	ND	0.00942496
Loc Phat	Lộc Phát	0.558	1986	Small-S	11.5434391, 107.8401071	11.5434	107.84	0.0015	0.0015
Long Tao	Long Tạo	42	2019	Medium	21.71359, 103.21469	21.7136	103.215	0.189	0.189
Ma Lu Thang	Ma Lừ Thàng	3	2018	Small-S	21.79271, 104.13288	21.7927	104.133	0.009313	0.009313
May Ho 2	Mây Hồ 2	6.6	2015	Small-S	22.43447, 103.82098	22.4345	103.821	ND	0.0261266
Mien Doi	Miền Đồi	1.6	2019	Small-S	20.55175, 105.41571	20.5517	105.416	ND	0.00626321
Minh Luong	Minh Lương	28	2018	Small-L	22.0445, 104.08987	22.0445	104.09	0.10315	0.10315
Minh Luong Thuong	Minh Lương Thượng	16	2019	Small-L	22.02736, 104.07906	22.0274	104.079	0.053339	0.053339
Minh Tan	Minh Tân	5	2019	Small-S	11.42052, 106.45023	11.4205	106.45	ND	0.0197495
Mong An	Mông Ân	30	2020	Medium	22.85437, 105.48805	20.5896	104.907	0.11	0.11
Muong Bang	Mường Bang	16	2022	Small-L	21.109527, 104.808782	21.1095	104.809	ND	0.0637819
Muong Hum	Mường Hum	32	2011	Medium	22.5404,103.7142	22.5404	103.714	0.12186	0.12186
Muong Hung	Mường Hung	24	2019	Small-L	20.98019, 103.81669	20.9802	103.817	0.093	0.093
Muong Khuong	Mường Khương	24	2019	Small-L	22.74537, 104.18705	22.7454	104.187	0.093	0.093
Muong Kim I	Mường Kim I	13.5	2010	Small-L	21.87222, 103.90589	21.8722	103.906	ND	0.0537438
Muong Kim II	Mường Kim II	10.5	2020	Small-L	21.87678, 103.89192	21.8768	103.892	ND	0.0417178
Muong Luan 1	Mường Luân 1	10	2022	Small-L	21.2429, 103.3381	21.2429	103.338	ND	0.0397159
Muong Muon	Mường Mươn	22	2022	Small-L	21.75148, 103.03763	21.7515	103.038	0.08478	0.08478
Muong Sang	Mường Sang	1.8	2004	Small-S	20.8348665, 104.5933951	20.8349	104.593	ND	0.00705267
Muong Sang 2	Mường Sang 2	4.6	2013	Small-S	20.84738, 104.57211	20.8474	104.572	ND	0.0181576
Muong Sang 3	Mường Sang 3	2.4	2020	Small-S	20.81938, 104.59064	20.8194	104.591	ND	0.00942496
Na Hau	Nà Hẩu	3.3	2012	Small-S	21.78351, 104.6068	21.7835	104.607	ND	0.012992
Na Loa	Nà Loà	6	2006	Small-S	22.6846,106.599	22.6846	106.599	0.03	0.03
Na Loi	Nà Lơi	9.3	2003	Small-L	21.4530531, 103.0496242	21.4531	103.05	0.046	0.046
Na Tau	Nà Tẩu	6	2014	Small-S	22.6733385, 106.5021461	22.6733	106.502	ND	0.0237336
Nam Ban 1	Nậm Ban 1	6.3	2019	Small-S	22.39938, 103.09965	22.3994	103.1	ND	0.0249299
Nam Ban 2	Nậm Ban 2	22	2019	Small-L	22.38028, 103.11644	22.3803	103.116	0.08478	0.08478
Nam Ban 3	Nậm Ban 3	22	2021	Small-L	22.3615895, 103.1749973	22.3616	103.175	0.0747	0.0747
Nam Bu	Nậm Bú	7.2	2014	Small-S	21.4379357, 104.0481657	21.4379	104.048	0.0287	0.0287
Nam Bum 1	Nậm Bụm 1	16	2020	Small-L	22.39401, 102.95269	22.394	102.953	0.05685	0.05685
Nam Bum 2	Nậm Bụm 2	28	2020	Small-L	22.38284, 102.89598	22.3828	102.896	ND	0.112113
Nam Can 2	Nậm Cắn 2	20	2015	Small-L	19.44937, 104.09592	19.4494	104.096	0.0675	0.0675
Nam Cat	Nậm Cắt	3.2	2012	Small-S	22.2016,105.7776	22.2016	105.778	ND	0.0125952
Nam Cau 2	Nậm Cấu 2	14.4	2018	Small-L	22.41546, 102.80948	22.4155	102.809	ND	0.0573559
Nam Chanh	Nậm Chanh	2.1	2010	Small-S	21.2537113, 103.8665177	21.2537	103.867	ND	0.00823815
Nam Chien 1	Nậm Chiến 1	200	2012	Large	21.5935,104.1444	21.5935	104.144	0.814	0.814
Nam Chien 2	Nậm Chiến 2	32	2009	Medium	21.5001,104.0908	21.5001	107.503	0.132	0.132
Nam Chien 3	Nậm Chiến 3	3.5	2018	Small-S	21.47878, 104.08097	21.4788	104.081	0.01064	0.01064
Nam Chim 1	Nậm Chim 1	16	2010	Small-L	21.3413399, 104.3498536	21.3413	104.35	0.103	0.103
Nam Chim 1A	Nậm Chim 1A	10	2015	Small-L	21.3275117, 104.3336194	21.3275	104.334	ND	0.0397159
Nam Chim 2	Nậm Chim 2	14	2015	Small-L	21.3154015, 104.2920384	21.3154	104.292	ND	0.0557503
Nam Cong 3	Nậm Công 3	10	2010	Small-L	21.0080309, 103.654	21.008	103.654	0.03546	0.03546
Nam Cong 4	Nậm Công 4	10	2010	Small-L	21.03075, 103.68279	21.0308	103.683	0.039234	0.039234
Nam Cong 5	Nậm Công 5	4	2018	Small-S	21.03875, 103.70927	21.0388	103.709	0.014917	0.014917
Nam Cum 4	Nậm Củm 4	54	2022	Medium	22.52271, 102.57077	22.5227	102.571	0.237	0.237
Nam Cun	Nậm Củn	40	2018	Medium	22.2667, 103.98446	22.2667	103.984	ND	0.160613
Nam Dich 1	Nậm Đích 1	18	2020	Small-L	22.23935, 103.61609	22.2394	103.616	0.072	0.072
Nam Dong 3	Nậm Đông 3	10	2011	Small-L	21.5783631, 104.4576541	21.5784	104.458	0.04533	0.04533
Nam Dong 4	Nậm Đông 4	11.4	2011	Small-L	21.58726, 104.3976	21.5873	104.398	0.05621	0.05621
Nam Giai	Nậm Giải	4	2021	Small-S	19.62516, 104.83741	19.6252	104.837	ND	0.0157718
Nam Gion	Nậm Giôn	20	2011	Small-L	21.67493, 103.7639	21.6481	103.757	ND	0.079868
Nam He	Nậm He	16	2012	Small-L	21.96425, 103.10187	21.9642	103.102	0.059	0.059
Nam Ho	Nậm Hô	7.5	2013	Small-S	22.5643,103.6805	22.5643	103.68	0.04	0.04
Nam Hoa 1	Nậm Hóa 1	18	2015	Small-L	21.413451, 103.40729	21.4135	103.407	0.06965	0.06965
Nam Hoa 2	Nậm Hóa 2	8	2013	Small-L	21.3557, 103.4076	21.3557	103.408	0.030888	0.030888
Nam Hong 1	Nậm Hồng 1	8	2013	Small-L	21.4515795, 104.2365852	21.4516	104.237	ND	0.0317168
Nam Hong 2	Nậm Hồng 2	8	2012	Small-L	21.4572, 104.2104	21.4572	104.21	ND	0.0317168
Nam Khanh	Nậm Khánh	12	2012	Small-L	22.4962817, 104.3968532	22.4963	104.397	0.0489	0.0489
Nam Khat	Nặm Khắt	7.5	2018	Small-S	22.08336, 104.09481	22.0834	104.095	0.033	0.033
Nam Khau Hu	Nậm Khẩu Hú	3	2018	Small-S	21.45759, 103.02716	21.4576	103.027	ND	0.011802
Nam Khoa 3	Nậm Khóa 3	18	2010	Small-L	22.05968, 103.97978	22.0597	103.98	0.0742	0.0742
Nam Khot	Nậm Khốt	14	2011	Small-L	21.6315,104.1718	21.6315	104.172	0.056	0.056
Nam La	Nậm La	27	2012	Small-L	21.40638, 103.94206	21.4064	103.942	0.1035	0.1035
Nam Luc	Nậm Lúc	24	2021	Small-L	22.35638, 104.38092	22.3564	104.381	ND	0.0959797
Nam Ly	Nậm Ly	5.1	2017	Small-S	22.54991, 104.56503	22.5499	104.565	0.02261	0.02261
Nam Ma	Nậm Má	3.2	1992	Small-S	22.75186, 104.92031	22.7519	104.92	0.01043	0.01043
Nam Ma 1 Main	Nậm Má 1 - Chính	20	2018	Small-L	22.8989354, 105.0900101	22.8989	105.09	0.08	0.08
Nam Mo - Than Uyen	Nậm Mở - Than Uyên	32	2013	Medium	21.74852, 103.87538	21.7485	103.875	0.0489	0.0489
Nam Mo Ky Son	Nậm Mô Kỳ Sơn	18	2013	Small-L	19.4137978, 104.1128003	19.4138	104.113	0.065	0.065
Nam Mu	Nậm Mu 2	10.2	2017	Small-L	21.78894, 103.32417	21.7889	103.324	ND	0.0405166
Nam Mu Bac Quang	Nậm Mu	12	2004	Small-L	22.5496,104.8767	22.5496	104.877	0.0557	0.0557
Nam Mu Lao Cai	Nậm Mu	10	2010	Small-L	22.02216, 103.999	22.0222	103.999	ND	0.0397159
Nam Muc	Nậm Mức	44	2014	Medium	21.7981,103.2935	21.7981	103.293	0.176	0.176
Nam Na 1	Nậm Na 1	30	2017	Medium	22.5956, 103.26108	22.5956	103.261	0.125	0.125
Nam Na 2	Nậm Na 2	66	2015	Medium	22.4932,103.234	22.4932	103.234	0.254	0.254
Nam Na 3	Nậm Na 3	84	2015	Medium	22.2985,103.1613	22.2985	107.832	0.361	0.361
Nam Ngan	Nậm Ngần	13.5	2009	Small-L	22.61478, 104.89466	22.6148	104.895	0.06027	0.06027
Nam Ngan 2	Nậm Ngần 2	12.8	2022	Small-L	22.64076, 104.83389	22.6408	104.834	0.04384	0.04384
Nam Nhun 1	Nậm Nhùn 1	10	2010	Small-L	22.23453, 104.14487	22.2345	104.145	ND	0.0397159
Nam Nhun 2	Nậm Nhùn 2	10	2019	Small-L	22.21782, 104.11827	22.2178	104.118	ND	0.0397159
Nam Non	Nậm Nơn	20	2015	Small-L	19.2968633, 104.4221734	19.2969	104.422	0.089	0.089
Nam Nua	Nậm Núa	10.8	2017	Small-L	21.3024738, 102.932522	21.3025	102.933	0.0421	0.0421
Nam Pac 1	Nậm Pạc 1	16	2021	Small-L	22.52133, 103.47048	22.5213	103.47	0.0705882	0.0705882
Nam Pac 2	Nậm Pạc 2	18	2022	Small-L	22.52188, 103.47029	22.5219	103.47	0.0771429	0.0771429
Nam Pay	Nậm Pay	7.5	2019	Small-S	21.80947, 103.39782	21.8095	103.398	0.025	0.025
Nam Phang A	Nậm Phàng A	36	2012	Medium	22.44679, 104.34081	21.7136	103.215	0.146	0.146
Nam Phang B	Nậm Phàng B	4.5	2021	Small-S	22.46822, 104.34649	22.4682	104.346	ND	0.0177598
Nam Pia	Nậm Pia	15	2009	Small-L	21.4452,104.1691	21.4452	104.169	0.061	0.061
Nam Pong	Nậm Pông	32	2014	Medium	19.51858, 105.03767	19.5186	105.038	0.13344	0.13344
Nam Pung	Nậm Pung	9.3	2014	Small-L	22.50349, 103.72038	22.5035	103.72	0.03706	0.03706
Nam Soi	Nậm Sọi	10	2010	Small-L	20.9141475, 103.7349677	20.9141	103.735	0.0377	0.0377
Nam Tha 3	Nậm Tha 3	14	2017	Small-L	21.89223, 104.3497	21.8922	104.35	ND	0.0557503
Nam Tha 4	Nậm Tha 4	12.5	2013	Small-L	21.90827, 104.37157	21.9083	104.372	ND	0.0497325
Nam Tha 5	Nậm Tha 5	15.5	2012	Small-L	21.92489, 104.38051	21.9249	104.381	ND	0.0617732
Nam Tha 6	Nậm Tha 6	6	2007	Small-S	21.94342, 104.38827	21.9434	104.388	0.023	0.023
Nam Toong	Nậm Toóng	30	2016	Medium	22.22246, 103.9442	22.2225	103.944	0.151	0.151
Nam Tuc	Nậm Tục	12.3	2010	Small-L	21.608, 104.45483	21.608	104.455	ND	0.0489305
Nam Xa	Nậm Xá	9.6	2015	Small-L	21.49112, 104.20997	21.4911	104.21	ND	0.038115
Nam Xay Luang	Nậm Xây Luông	15	2015	Small-L	21.95533, 104.13236	21.9553	104.132	ND	0.059765
Nam Xay Luang 3	Nậm Xây Luông 3	12	2019	Small-L	19.11302, 104.71954	19.113	104.72	0.04129	0.04129
Nam Xay Luang 4-5	Nậm Xây Luông 4,5	30	2019	Medium	21.98969, 104.07192	21.9897	104.072	ND	0.120186
Nam Xay Noi 2	Nậm Xây Nọi 2	12	2012	Small-L	21.96184, 104.04869	21.9618	104.049	ND	0.0477278
Nam Xi Lung 1	Nậm Xí Lùng 1	29	2021	Small-L	22.53398, 102.83936	22.534	102.839	ND	0.116149
Nam Yen	Nậm Yên	10	2019	Small-L	22.62979, 104.48878	22.6298	104.489	0.03758	0.03758
Ngan Truoi	Ngàn Trươi	25.5	2022	Small-L	18.38733, 105.48679	18.3873	105.487	0.07371	0.07371
Ngoi Duang 1	Ngòi Đường 1	6.4	2008	Small-S	22.34551, 103.94816	22.3455	103.948	ND	0.0253287
Ngoi Duang 2	Ngòi Đường 2	5	2011	Small-S	22.36905, 103.96092	22.3691	103.961	ND	0.0197495
Ngoi Hut 1	Ngòi Hút 1	8.4	2011	Small-L	21.8093, 104.4361	21.8093	104.436	0.036	0.036
Ngoi Hut 2	Ngòi Hút 2	48	2014	Medium	21.7938, 104.3324	21.7938	104.332	0.209	0.209
Ngoi Hut 2A	Ngòi Hút 2A	8.4	2017	Small-L	21.78625, 104.42635	21.7862	104.426	ND	0.0333155
Ngoi Phat	Ngòi Phát	84	2014	Medium	22.5546,103.7434	22.5546	103.743	0.39	0.39
Ngoi Xan 1	Ngòi Xan 1	10.5	2007	Small-L	22.4751637, 103.8594984	22.4752	103.859	0.042	0.042
Ngoi Xan 2	Ngòi Xan 2	8	2008	Small-L	22.46793, 103.83649	22.4679	103.836	0.041	0.041
Nhan Co	Nhân Cơ	2.4	2017	Small-S	11.98643, 107.59699	11.9864	107.597	ND	0.00942496
Nhan Hac A	Nhạn Hạc A	55	2018	Medium	19.55474, 104.9730	19.5547	104.973	0.2016	0.2016
Nhan Hac B	Nhạn Hạc B	4	2018	Small-S	19.55937, 104.97329	19.5594	104.973	ND	0.0157718
Nho Que 1	Nho Quế 1	32	2018	Medium	23.23028, 105.43083	23.2303	105.431	0.12929	0.12929
Nho Que 2	Nho Quế 2	48	2016	Medium	23.17802, 105.48504	23.178	105.485	0.225	0.225
Nho Que 3	Nho Quế 3	110	2012	Large	23.1433,105.5154	23.1433	105.515	0.507	0.507
Noong Phai	Noong Phai	21.2	2019	Small-L	21.50673, 104.45076	21.5067	104.451	0.06945	0.06945
Nuoc Bieu	Nước Biêu	14	2019	Small-L	15.07934, 108.06421	15.0793	108.064	0.049	0.049
Nuoc Oa	Nước Oa	2.2	1985	Small-S	15.28696, 108.18456	15.287	108.185	ND	0.00863361
Nuoc Oa 3	Nước Oa 3	1.2	2010	Small-S	15.369, 108.27699	15.369	108.277	ND	0.00468675
Nuoc Trong	Nước Trong	16.5	2012	Small-L	15.0809,108.4118	15.0809	108.412	0.07	0.07
Nuoc Xang	Nước Xáng	5.4	2019	Small-S	14.51212, 108.83007	14.5121	108.83	ND	0.0213425
Pa Chien	Pá Chiến	22	2013	Small-L	21.4737836, 104.0764455	21.4738	104.076	0.082	0.082
Pa Hu	Pá Hu	26	2020	Small-L	21.45615, 104.46368	21.4562	104.464	0.085	0.085
Pa Ke	Pa Ke	26	2018	Small-L	22.69824, 104.33629	22.6982	104.336	0.0964	0.0964
Pa Khoang	Pa Khoang	4.5	2010	Small-S	21.45277, 103.08957	21.4528	103.09	ND	0.0177598
Pac Cap	Pác Cáp	6	2021	Small-S	22.21297, 106.13043	22.213	106.13	ND	0.0237336
Pac Ma	Pắc Ma	140	2019	Large	22.56629, 102.51615	22.5663	102.516	0.616	0.616
Phinh Ho	Phình Hồ	5.5	2019	Small-S	21.54923, 104.57865	21.5492	104.579	ND	0.0217408
Pho Cu	Phố Cũ	10	2010	Small-L	22.57767, 103.82584	22.5777	103.826	ND	0.0397159
Phu Mao 1	Phú Mậu 1	2.4	2009	Small-S	21.9599, 104.3397	21.9599	104.34	ND	0.00942496
Phu Mao 2	Phú Mậu 2	1.8	2009	Small-S	21.97808, 104.33618	21.9781	104.336	ND	0.00705267
Phu Mao 3	Phú Mậu 3	1.4	2009	Small-S	21.98987, 104.32752	21.9899	104.328	ND	0.00547453
Phuc Long	Phúc Long	22	2021	Small-L	22.20006, 104.54264	22.2001	104.543	0.0878	0.0878
Plei Kan	Plei Kần	17	2020	Small-L	14.7102, 107.7118	14.7102	107.712	0.059051	0.059051
Plei Keo	Plei Keo	13.5	2021	Small-L	13.78721, 108.16288	13.7872	108.163	ND	0.0537438
PleiKrong	Pleikrong	100	2009	Large	14.4084,107.863	14.4084	107.863	0.479	0.479
Po Ho	Pờ Hồ	13.2	2019	Small-L	22.45905, 103.66704	22.4591	103.667	0.05214	0.05214
Quang Hiep	Quảng Hiệp	0.5	2002	Small-S	12.88209, 107.98026	12.8821	107.98	0.003	0.003
Quang Tin	Quảng Tín	5	2009	Small-S	11.9631,107.4493	11.9631	107.449	0.021	0.021
Rao Quan 1	Rào Quán 1	64	2009	Medium	16.681224, 106.7056032	16.6812	106.706	0.2174	0.2174
Rao Trang 3	Rào Trăng 3	13	2019	Small-L	16.4093, 107.23925	16.4093	107.239	0.044	0.044
Rao Trang 4	Rào Trăng 4	14	2019	Small-L	16.39757, 107.29723	16.3976	107.297	0.05215	0.05215
Ry Ninh I	Ry Ninh I	3.6	2006	Small-S	14.18023, 107.82632	14.1802	107.826	ND	0.0141828
Ry Ninh II	Ry Ninh II	8.1	2006	Small-L	14.209,107.8141	14.209	107.814	ND	0.0321164
Sai Luong	Sài Lương	4.5	2022	Small-S	21.68397, 104.54768	21.684	104.548	0.016448	0.016448
Sao Va	Sao Va	3	2010	Small-S	19.6605,104.9386	19.6605	104.939	0.01345	0.01345
Sap Viet	Sập Việt	21	2013	Small-L	21.0656, 104.34537	21.0656	104.345	ND	0.0838937
Se San 3	Sê San 3	260	2006	Large	14.2152,107.7222	14.2152	107.722	1.127	1.127
Se San 3A	Sê San 3A	108	2007	Large	14.1063,107.6577	14.1063	107.658	0.4284	0.4284
Se San 4	Sê San 4	360	2009	Very Large	13.9678,107.4953	13.9678	107.495	1.042	1.042
Se San 4A	Sê San 4A	63	2011	Medium	13.9308,107.4678	13.9308	107.468	0.331	0.331
Seo Chong Ho	Séo Chong Hô	21	2012	Small-L	22.2481,103.8963	22.2481	103.896	0.115	0.115
So Lo 1A	So Lo 1A	1	2012	Small-S	20.74243, 105.0213	20.7424	105.021	ND	0.0039
So Lo 1B	So Lo 1B	1	2012	Small-S	20.73792, 105.01301	20.7379	105.013	ND	0.0039
So Lo 2	So Lo 2	3.2	2012	Small-S	20.73956, 105.02773	20.7396	104.92	ND	0.0125952
So Vin	Sơ Vin	2.8	2017	Small-S	20.90314, 104.86527	20.9031	104.865	ND	0.0110092
Son Giang	Sơn Giang	10	2019	Small-L	12.95019, 109.02399	12.9502	109.024	ND	0.0397159
Son La	Sơn La	2400	2012	Mega	21.4971,103.996	21.4971	103.996	10	10
Son Tra 1A	Sơn Trà 1A	30	2019	Medium	14.84632, 108.42447	14.8463	108.424	0.105	0.105
Son Tra 1B	Sơn Trà 1B	30	2019	Medium	14.8695935, 108.453365	14.8696	108.453	0.105	0.105
Son Tra 1C	Sơn Trà 1C	9	2021	Small-L	14.90782, 108.47422	14.9078	108.474	0.03246	0.03246
Song Ba Ha	Sông Ba Hạ	220	2008	Large	13.0226,108.9039	13.0226	108.904	0.825	0.825
Song Bac	Sông Bạc	42	2014	Medium	22.45247, 104.72285	22.4525	104.723	0.166188	0.166188
Song Bo	Sông Bồ	20	2020	Small-L	16.23493, 107.3722	16.2349	107.372	0.0687	0.0687
Song Bung 2	Sông Bung 2	100	2017	Large	15.7172413, 107.3965838	15.7172	107.397	0.42557	0.42557
Song Bung 4	Sông Bung 4	156	2015	Large	15.69878, 107.64004	15.7258	107.651	0.586	0.586
Song Bung 4A	Sông Bung 4A	49	2012	Medium	15.7646,107.68021	15.7646	107.68	0.2	0.2
Song Bung 5	Sông Bung 5	57	2013	Medium	15.81897, 107.77878	15.819	107.779	0.187	0.187
Song Bung 6	Sông Bung 6	29	2012	Small-L	15.80811, 107.74707	20.5896	104.907	0.12052	0.12052
Song Chay 3	Sông Chảy 3	14	2019	Small-L	22.74145, 104.62778	22.7415	104.628	0.04746	0.04746
Song Chay 5	Sông Chảy 5	16	2012	Small-L	22.7148,104.535	22.7148	104.535	0.066	0.066
Song Chay 6	Sông Chảy 6	16	2019	Small-L	22.69073, 104.46515	22.6907	104.465	0.05721	0.05721
Song Cho 2	Sông Chò 2	7	2018	Small-S	12.43893, 108.84282	12.4389	108.843	0.026	0.026
Song Chung	Sông Chừng	19.5	2011	Small-L	22.4296601, 104.6355583	22.4297	104.636	0.09	0.09
Song Con 2	Sông Côn 2	57	2009	Medium	15.93338, 107.80817	15.9334	107.808	ND	0.229515
Song Cung	Sông Cùng	1.6	2008	Small-S	15.8733698, 107.9538451	15.8734	107.954	ND	0.00626321
Song Giang 1	Sông Giang 1	12	2021	Small-L	12.3968747, 108.8020674	12.3969	108.802	ND	0.0477278
Song Giang 2	Sông Giang	37	2014	Medium	12.3729, 108.838	12.3729	108.838	0.155	0.155
Song Hinh	Sông Hinh	70	2001	Medium	12.92734, 108.9457	12.9273	108.946	0.37	0.37
Song Kon 2	Sông Kôn 2	60	2009	Medium	15.9853584, 107.7900586	15.9854	107.79	0.209	0.209
Song Lo 2	Sông Lô 2	28	2018	Small-L	22.72269, 104.97384	22.7227	104.974	0.117	0.117
Song Lo 4	Sông Lô 4	24	2017	Small-L	22.5418184, 104.905757	22.5418	104.906	0.08	0.08
Song Lo 6	Sông Lô 6	48	2020	Medium	22.29479, 104.91798	22.2948	104.918	0.207	0.207
Song Lo 8A	Sông Lô 8A	27	2020	Small-L	22.0626, 105.05647	22.0626	105.056	0.10661	0.10661
Song Lo 8B	Sông Lô 8B	27	2020	Small-L	21.9068, 105.17414	21.9068	105.174	0.10907	0.10907
Song Mien 1	Sông Miện 1	6	2011	Small-S	23.1576317, 105.0179284	23.1576	105.018	0.025	0.025
Song Mien 5	Sông Miện 5	20	2012	Small-L	22.9220335, 105.0063895	22.922	105.006	0.075	0.075
Song Mien 5A	Sông Miện 5A	9	2015	Small-L	22.8892, 104.99591	22.8892	104.996	0.035	0.035
Song Mien 6	Sông Miện 6	12	2017	Small-L	22.8459257, 105.0135495	22.8459	105.014	ND	0.0477278
Song Muc	Sông Mực	2	2008	Small-S	19.6106,105.5416	19.6106	105.542	ND	0.00784283
Song Nhiem 4	Sông Nhiệm 4	6	2020	Small-S	23.01055, 105.47762	23.0105	105.478	ND	0.0237336
Song Ong	Sông Ông	8.1	2009	Small-L	11.75348, 108.80541	11.7535	108.805	0.041	0.041
Song Ong 1	Sông Ông 1	5.8	2021	Small-S	11.72649, 108.81055	11.7265	108.811	ND	0.0229363
Song Pha	Sông Pha	7.5	1995	Small-S	11.8331,108.6841	11.8331	108.684	0.04	0.04
Song Quang	Sông Quang	12	2020	Small-L	19.56859, 104.76895	19.5686	104.769	0.047	0.047
Song Rieng	Sông Riềng	2.95	2012	Small-S	15.16787, 108.37123	15.1679	108.371	0.0119	0.0119
Song Tranh 2	Sông Tranh 2	190	2010	Large	15.3312,108.1478	15.3312	108.148	0.6796	0.6796
Song Tranh 3	Sông Tranh 3	62	2013	Medium	15.4443,108.143	15.4443	108.143	0.2034	0.2034
Song Tranh 4	Sông Tranh 4	48	2020	Medium	15.52705, 108.14808	15.527	108.148	0.18	0.18
Srepok 3	Srêpôk 3	220	2009	Large	12.7524,107.8768	12.7524	107.877	1.002	1.002
Srepok 4	Srêpôk 4	80	2010	Medium	12.8072,107.8551	12.8072	107.855	0.308	0.308
Srepok 4A	Srêpôk 4A	64	2014	Medium	12.8935,107.8123	12.8935	107.812	0.30835	0.30835
Srok Phu Mieng	Srok Phu Miêng	51	2006	Medium	11.7689,106.7564	11.7689	106.756	0.228	0.228
Su Pan 1	Sử Pán 1	30	2019	Medium	22.2908948, 103.9143272	22.2909	103.914	0.122	0.122
Su Pan 2	Sử Pán 2	34.5	2012	Medium	22.27227, 103.94015	22.2723	103.94	0.165	0.165
Sung Vui	Sùng Vui	18	2013	Small-L	22.45812, 103.85674	22.4581	103.857	0.058	0.058
Suoi Chan 1	Suối Chăn 1	27	2020	Small-L	22.11171, 104.20733	22.1117	104.207	0.101	0.101
Suoi Chan 2	Suối Chăn 2	16	2017	Small-L	22.1581414, 104.2413769	22.1581	104.241	ND	0.0637819
Suoi Lum 1	Suối Lừm 1	20	2013	Small-L	21.36842, 104.21836	21.3684	104.218	0.08034	0.08034
Suoi Lum 3	Suối Lừm 3	14	2015	Small-L	21.35653, 104.20314	21.3565	104.203	ND	0.0557503
Suoi Mu	Suối Mu	9	2019	Small-L	20.40496, 105.37267	20.405	105.373	0.034	0.034
Suoi Nhap A	Suối Nhạp A	4	2013	Small-S	20.93877, 104.97428	20.9388	104.974	0.01154	0.01154
Suoi Sap 1	Suối Sập 1	20	2013	Small-L	21.267, 104.54122	21.267	104.541	0.06389	0.06389
Suoi Sap 2	Suối Sập 2	14.5	2007	Small-L	21.25612, 104.52573	21.2561	104.526	ND	0.0577574
Suoi Sap 3	Suối Sập 3	14	2011	Small-L	21.2235, 104.4954	21.2235	104.495	0.0531	0.0531
Suoi Suu 1	Suối Sửu 1	3.2	2012	Small-S	22.84755, 104.87157	22.8475	104.92	ND	0.0125952
Suoi Suu 2	Suối Sửu 2	2.4	2010	Small-S	22.8578077, 104.8846396	22.8578	104.885	ND	0.00942496
Suoi Trang	Suối Tráng	2.4	2010	Small-S	20.73512, 105.25085	20.7351	105.251	ND	0.00942496
Suoi Trat	Suối Trát	2.4	2008	Small-S	22.29064, 104.10648	22.2906	104.106	ND	0.00942496
Ta Co	Tà Cọ	30	2012	Medium	20.9734081, 103.6360008	20.9734	103.636	0.12189	0.12189
Ta Lang	Tà Làng	4.5	2009	Small-S	22.288047, 105.7049865	22.288	105.705	0.018	0.018
Ta Lat	Tà Lạt	9	2013	Small-L	22.55426, 104.0549	22.5543	104.055	ND	0.0357146
Ta Loi 1	Tà Lơi 1	15	2019	Small-L	22.48766, 103.6648	22.4877	103.665	0.058	0.058
Ta Loi 2	Tà Lơi 2	10.5	2016	Small-L	22.50272, 103.68619	22.5027	103.686	0.048	0.048
Ta Loi 3	Tà Lơi 3	7.5	2019	Small-S	22.52556, 103.69876	22.5256	103.699	0.03	0.03
Ta Niet	Tà Niết	3.6	2014	Small-S	20.8944,104.5229	20.8944	104.523	ND	0.0141828
Ta Nung	Tà Nung	2	2011	Small-S	11.9162, 108.34856	11.9162	108.349	ND	0.00784283
Ta Sa	Tà Sa	0.25	1928	Small-S	22.66439, 106.04646	22.6644	106.046	ND	0.00096438
Ta Thang	Tà Thàng	60	2013	Medium	22.2987,104.0221	22.2987	104.022	0.2452	0.2452
Ta Trach	Tả Trạch	21	2013	Small-L	16.3164,107.6374	16.3164	107.637	ND	0.0838937
Ta Vi	Tà Vi	3	2011	Small-S	15.2624,108.1466	15.2624	108.147	0.0119	0.0119
Tan Loc	Tân Lộc	12.4	2022	Small-L	11.51468, 107.88703	11.5147	107.887	ND	0.0493315
Tat Ngoang	Tắt Ngoẵng	7	2013	Small-S	20.86476, 104.56953	20.8648	104.57	0.03	0.03
Thac Ba	Thác Bà	120	1971	Large	21.7471,105.0233	21.7471	105.023	0.616	0.616
Thac Bay	Thác Bay	1.6	1991	Small-S	21.46878, 103.05854	21.4688	103.059	0.007	0.007
Thac Ca 1	Thác Cá 1	27	2020	Small-L	21.69846, 104.63227	21.6985	104.632	0.099	0.099
Thac Ca 2	Thác Cá 2	14.5	2021	Small-L	21.74115, 104.64444	21.7412	104.644	0.055	0.055
Thac Gieng 1	Thac Gieng Bac 1	4.5	2021	Small-S	22.09578, 105.89631	22.0958	105.896	ND	0.0177598
Thac Gieng Bac 2	Thác Giềng Bậc 2	4	2022	Small-S	22.05144, 105.87419	22.0514	105.874	ND	0.0157718
Thac Mo	Thác Mơ	150	1995	Large	11.8578,107.0193	11.8578	107.019	0.79	0.79
Thac Mo ext	Thác Mơ ext	75	2014	Medium	11.85764, 107.01933	11.8576	107.019	0.44	0.44
Thac Thuy	Thác Thúy	2.68	1986	Small-S	22.41576, 104.81168	22.4158	104.812	ND	0.0105337
Thac Trang	Thác Trắng	6	2006	Small-S	21.45797, 103.07811	21.458	103.078	0.0219	0.0219
Thac Xang	Thác Xăng	20	2016	Small-L	22.17108, 106.50021	22.1711	106.5	0.0653	0.0653
Thai An	Thái An	82	2010	Medium	22.9992745, 105.0658634	22.9993	107.832	0.395	0.395
Than Giap	Thân Giáp	6	2018	Small-S	22.73454, 106.54666	22.7345	106.547	ND	0.0237336
Thanh Son	Thành Sơn	30	2019	Medium	20.58964, 104.9073	20.5896	104.907	0.123	0.123
Thanh Thuy 1	Thanh Thủy 1	11	2011	Small-L	22.8655521, 104.8066707	22.8656	104.807	ND	0.0437204
Thanh Thuy 2	Thanh Thủy 2	9	2011	Small-L	22.8981014, 104.8444106	22.8981	104.844	0.04	0.04
Thao Sa Chai	Thào Sa Chải	6.5	2022	Small-S	21.84959, 104.25117	21.8496	104.251	0.022684	0.022684
Thoong Cot 2	Thoong Cót 2	3.5	2013	Small-S	22.8297,106.6189	22.8297	106.619	0.01471	0.01471
Thuan Hoa	Thuận Hòa	38	2017	Medium	22.9601529, 105.0346451	21.7136	103.215	0.133	0.133
Thuong An	Thượng Ân	2.4	2008	Small-S	22.5041,105.9936	22.5041	105.994	ND	0.00942496
Thuong Kon Tum	Thượng Kon Tum	220	2017	Large	14.6941,108.2299	14.6941	108.23	1	1
Thuong Lo	Thượng Lộ	6	2015	Small-S	16.1409986, 107.7500341	16.141	107.75	0.02141	0.02141
Thuong Nhat	Thượng Nhật	7	2019	Small-S	16.11334, 107.69422	16.1133	107.694	0.04	0.04
Thuong Song Ong 1	Thượng Sông Ông 1	5.8	2021	Small-S	11.8261857, 108.7439473	11.8262	108.744	0.0225	0.0225
Tien Thanh	Tiên Thành	16.5	2019	Small-L	22.57031, 106.43639	22.5703	106.436	0.049	0.049
To Buong	To Buông	10.1	2017	Small-L	20.9482793, 104.4160138	20.9483	104.416	0.03618	0.03618
Tra Linh 3	Trà Linh 3	7.2	2021	Small-S	15.04521, 108.06793	15.0452	108.068	0.02985	0.02985
Tra Xom	Trà Xom	20	2013	Small-L	14.28267, 108.68726	14.2827	108.687	0.086	0.086
Tram Tau	Trạm Tấu	30	2018	Medium	21.50217, 104.4422	21.5022	104.442	0.123	0.123
Tri An	Trị An	400	1991	Very Large	11.1048,106.9848	11.1048	106.985	1.619	1.619
Tri Nang	Trí Năng	5.4	2020	Small-S	20.11886, 105.20353	20.1189	105.204	ND	0.0213425
Trung Ho	Trung Hồ	8.4	2013	Small-L	22.46177, 103.81706	22.4618	103.817	ND	0.0333155
Trung Son	Trung Sơn	260	2017	Large	20.60951, 104.83828	20.6095	104.838	1.019	1.019
Trung Thu	Trung Thu	29.6	2016	Small-L	21.9385184, 103.2560962	20.5896	104.907	0.113	0.113
Trung Xuan	Trung Xuân	10.5	2020	Small-L	20.35252, 105.09265	20.3525	105.093	0.048	0.048
Tuyen Quang	Tuyên Quang	342	2008	Very Large	22.36,105.3985	22.36	105.398	1.329	1.329
Van Chan	Văn Chấn	57	2013	Medium	21.68121, 104.54863	21.6812	104.549	0.2465	0.2465
Van Ho	Vạn Hồ	4.5	2010	Small-S	22.47325, 103.873	22.4733	103.873	ND	0.0177598
Van Phong	Văn Phong	6	2015	Small-S	13.9369606, 108.8732457	13.937	108.873	0.022778	0.022778
Vinh Ha	Vĩnh Hà	21	2016	Small-L	22.309307, 104.4417033	22.3093	104.442	0.089	0.089
Vinh Son	Vĩnh Sơn	66	1994	Medium	14.3656,108.6943	14.3656	108.694	0.23	0.23
Vinh Son 4	Vĩnh Sơn 4	18	2018	Small-L	14.3778231, 108.7147305	14.3778	108.715	ND	0.0718214
Vinh Son 5	Vĩnh Sơn 5	28	2014	Small-L	14.3611,108.7203	14.3611	108.72	0.1029	0.1029
Vuc Tuan	Vực Tuần	5	2020	Small-S	21.44149, 104.68381	21.4415	104.684	0.01922	0.01922
Xim Vang 2	Xim Vang 2	18	2016	Small-L	21.3096075, 104.3487763	21.3096	104.349	0.06531	0.06531
Xoong Con	Xoóng Con	15	2012	Small-L	19.18226, 104.46826	19.1823	104.468	0.054812	0.054812
Xuan Minh	Xuân Minh	15	2018	Small-L	19.88242, 105.33475	19.8824	105.335	0.0651	0.0651
Xuan Nha	Xuân Nha	4	2016	Small-S	20.72471, 104.7414	20.7247	104.741	0.0144	0.0144
Yan Tann Sien	Yan Tann Sien	19.5	2014	Small-L	12.18353, 108.41978	12.1835	108.42	0.079	0.079
Yang Trung	Yang Trung	0.11	2012	Small-S	14.1704, 108.29801	14.1704	108.298	ND	0.000421584
Za Hung	Za Hung	30	2009	Medium	15.86,107.6538	15.86	107.654	0.122	0.122

## Sheet: Some stage of development
Name (English)	Name (Vietnamese)	Peak Installed Capacity (MW)	Year	Class	Latitude, Longitude	Latitude	Longitude
A Tro	A Tro	10	2099	Small-L	16.50599, 107.03042	16.506	107.03		See associated Supplement File "Notes" for clarifications
Bac Ai	two units	24	2099	Small-L	11.87129, 108.77356	11.8713	108.774
Bac Khe 1	Bắc Khê 1	10	2099	Small-L	22.28381, 106.39681	22.2838	106.397
Ban Ho	Bản Hồ	10	2099	Small-L	22.26104, 103.97634	22.261	103.976
Ban Mong	Bản Mồng	42	2099	Medium	19.44755, 105.3034	19.4475	105.303
Ban Nhung #6	Bản Nhùng #6	13	2099	Small-L	22.0025, 106.58996	22.0025	106.59
Bao Lac A	Bảo Lạc A	30	2099	median	22.95877, 105.77375	22.9588	105.774
Bo Mong	Thuỷ Điện Bó Mồng	5	2099	Small-S	20.9030035, 104.8652966	20.903	104.865
Bo Sinh	Bó Sinh	24	2099	Small-L	21.28943, 103.46762	21.2894	103.468
Ca Loi	Ca Lôi	10	2099	Small-L	19.43516, 104.16335	19.4352	104.163
Cam Ly	Cam Ly	9.6	2099	Small-S	11.8970915, 108.3444645	11.8971	108.344
Chau Thon extension	Châu Thôn	6.8	2020	Small-S	19.57724, 104.79167	19.5772	104.792
Chu Linh	Chu Linh	11	2099	Small-L	22.40588, 103.87264	22.4059	103.873
Chu Va 2	Chu Va 2	14	2099	Small-L	22.33887, 103.66619	22.3389	103.666
Da Cho Mo 2	Đa Cho Mo 2	4.6	2099	Small-S	11.88507, 108.24642	11.8851	108.246
Da chomo	Đa Chomo	9	2099	Small-S	11.9022, 108.29344	11.9022	108.293
Da Dang	Đa Dâng	14	2099	Small-L	11.97438, 108.31394	11.9744	108.314
Da Nhim Tuong 3	Đa Nhim Thượng 3	8.1	2099	Small-S	11.96886, 108.57564	11.9689	108.576
Dai Binh	Đại Bình	12.6	2099	Small-L	11.49797, 107.84982	11.498	107.85
Dak A Koi	Đắk A Koi	60	2099	median	14.523217, 108.1807984	14.5232	108.181
Dak Ba	Dăk Ba	19.5	2099	Small-L	15.05872, 108.27579	15.05872	108.276
Dak Bla 3	Đắk Bla 3	8.6	2018	Small-L	14.325, 108.08202	14.325	108.082
Dak Di 1	Đăk Di 1	30	2099	Medium	15.03938, 108.10689	15.0394	108.107
Dak Di 2	Đăk Di 2	20	2099	Small-L	15.06713, 108.09308	15.0671	108.093
Dak Mek 3	Đắk Mek 3	7.5	2099	Small-S	15.14546, 107.90818	15.1455	107.908
Dak Mi 1	Đăk Mi 1	84	2099	Medium	15.18199, 107.81958	15.182	107.82
Dak Mi 1A	Đăk Mi 1A	11	2099	Small-L	15.18618, 107.80067	15.1862	107.801
Dak Mi 4 (small unit)	Đăk Mi 4	5	2099	Small-S	15.44214, 107.89413	15.4421	107.894
Dak Nghe	Đăk Nghé	7	2099	Small-S	14.60241, 108.23332	14.6024	108.233
Dak Pla	flood + HP	27	2099	Small-L	14.32554, 108.08214	14.3255	108.082
Dak Pring 2	Đăk Pring 2	5.4	2099	Small-S	15.63586, 107.55653	15.6359	107.557
Dak Psi 6	Đắk Psi 6	12	2099	Small-L	14.70292, 107.96605	14.7029	107.966
Dak Psi level 1	Đăk Psi bậc 1	9	2099	Small-S	14.7153764, 107.9868491	14.7154	107.987
Dak Psi level 2	Đăk Psi bậc 2	9	2099	Small-S	14.7031267, 107.9656217	14.7031	107.966
Dak Re 2	Đăk Re 2	10	2099	Small-L	14.66236, 108.52626	14.6624	108.526
Dak R'Keh	Đắk R’Kéh	5	2099	Small-S	11.82957, 107.47964	11.8296	107.48
Dak Ruoi	Đăk Ruồi	24	2099	Small-L	15.10299, 107.75126	15.103	107.751
Dak Ruoi 2	Đăk Ruồi 2	14	2099	Small-L	15.09526, 107.74725	15.0953	107.747
Dak Sor 2	Đăk Sor 2	4	2099	Small-S	12.48325, 107.76311	12.4832	107.763
Dak Trua 1	Đăk Trưa 1	4.8	2099	Small-S	14.71425, 108.00475	14.7142	108.005
Dak Trua 2	Đăk Trưa 2	4	2099	Small-S	14.70675, 107.98717	14.7067	107.987
Dakrong 5	Đakrông 5	10	2099	Small-L	16.46652, 106.98814	16.4665	106.988
Dam B'ri	Đam B’Ri	9	2099	Small-S	12.0860668, 108.5950003	12.0861	108.595
Dar Cao	Đa R’cao	2	2099	Small-S	11.80438, 108.44133	11.8044	108.441
De Dinh Mao	Đề Dính Máo	10	2099	Small-L	21.67847, 104.03285	21.6785	104.033
Dong Nai 1	Đồng Nai 1	15	2099	Small-L	11.66405, 108.20717	11.664	108.207
Ea M'Droh	uncertain	5	2099	Small-S	12.92086, 107.96659	12.9209	107.967
Ea Wer	Ea Wer	3	2099	Small-S	12.83148, 107.89593	12.8315	107.89593
Hang Dong B	Háng Đồng B	28	2099	Small-L	21.28573, 104.47341	21.2857	104.473
Hang Dong B	cancelled	5	2099	Small-S	21.28573, 104.47341	21.2857	104.473
Ho Ban Lai	Hồ Bản Lải	7	2099	Small-S	21.72174, 107.02085	21.7217	107.021
Hoa Binh Expansion	Hòa Bình	480	2099	Very Large	20.8082,105.3233	20.8082	105.323
Hoa Tham	Hoa Thám	5.8	2099	Small-S	22.61879, 106.10102	22.6188	106.101
Hong Nam	Hồng Nam	24	2099	Small-L	22.58986, 106.36123	22.5899	106.361
Hua Bun	Hua Bun	11.2	2099	Small-L	22.39297, 103.06965	22.393	103.07
Hua Chang 2	Hua Chăng 2	7	2099	Small-S	22.17073, 103.76485	22.1707	103.765
Huong Phung	Hướng Phùng	18	2099	Small-L	16.7076, 106.56789	16.7076	106.568
Huong Son 2	Hương Sơn 2	6.4	2099	Small-S	18.42311, 105.173	18.4231	105.173
Ia Grang 1	Ia Grăng 1	5	2099	Small-S	14.01054, 107.81161	14.0105	107.812		Pending: duplicate
Ia Grange 1	Ia Grănge 1	5.6	2099	Small-S	14.01054, 107.81161	14.0105	107.812
Ialy expansion	Ialy	360	2099	Very Large	14.2274,107.8294	14.2274	107.829
Ka Tinh 1	Kà Tinh 1	7	2099	Small-S	15.23538, 108.43618	15.2354	108.436
Ka Tinh 2	Kà Tinh 2	5	2099	Small-S	15.25085, 108.45436	15.2508	108.454
Khe Dien Extension	uncertain	6	2099	Small-S	15.69885, 107.96297	15.6989	107.963
Khuoi Luong	Khuổi Luông	10	2099	Small-L	22.59168, 106.57169	22.5917	106.572
Khuoi Noc	Khuổi Nộc	10	2099	Small-L	22.29468, 106.07189	22.2947	106.072
La Ngau	La Ngâu	36	2099	Medium	11.17361, 107.77681	11.1736	107.777
La Trong	La Trọng	18	2099	Small-L	17.85341, 105.75708	17.8534	105.757
Man Thang 3	Mận Thắng 3	15	2099	Small-L	22.4771181, 104.6028745	22.4771	104.603
May Ho	Mây Hồ; 3 dams	6.5	2099	Small-S	22.41959, 103.77853	22.4196	103.779
Mun Chung 2	Mùn Chung 2	9	2099	Small-S	21.78013, 103.36794	21.7801	103.368
Muong Kim III	Mường Kim III	10	2099	Small-L	21.88315, 103.87714	21.8832	103.877
Muong Luan 2	Mường Luân 2	18	2099	Small-L	21.24866, 103.36383	21.2487	103.364
Muong Mit	Mường Mít	10	2099	Small-L	22.03058, 103.85982	22.0306	103.86
My Son	Mỹ Sơn	20	2099	Small-L	11.70302, 108.82219	11.703	108.822
Na Son	Na Son	3.4	2099	Small-S	21.31056, 103.24768	21.3106	103.248
Nam An	Nậm An	8	2099	Small-S	22.55739, 104.87526	22.5574	104.875
Nam Be	Nậm Be	4.6	2099	Small-S	22.2266, 103.75869	22.2266	103.759
Nam Bon	Nậm Bon	3.6	2099	Small-S	22.25, 103.73607	22.25	103.736
Nam Cay	Nậm Cáy	5	2099	Small-S	22.62986, 103.29198	22.6299	103.292
Nam Chan	NẬM CHẢN	5	2099	Small-S	22.2514323, 103.3081909 22.2514323	22.2514	103.308
Nam Chau 1	Nậm Cấu 1	13.2	2099	Small-L	22.43117, 102.79769	22.4312	102.798
Nam Chim 1B	Nậm Chim 1B	10	2099	Small-L	21.34487, 104.30165	21.3449	104.302
Nam Cong 3A	Nậm Công 3A	4.5	2099	Small-S	21.03139, 103.73053	21.0314	103.731
Nam Cum 1	Nậm Củm 1	11	2099	Small-L	22.62276, 102.68822	22.6228	102.688
Nam Cum 2	Nậm Củm 2	12	2099	Small-L	22.57706, 102.69082	22.5771	102.691
Nam Cum 3	Nậm Củm 3	45	2099	Medium	22.41467, 102.84888	22.4147	102.849
Nam Cum 5	Nậm Củm 5	10	2099	Small-L	22.53115, 102.59661	22.5312	102.597
Nam Cum 6	Nậm Củm 6	7	2099	Small-S	22.58708, 102.65147	22.5871	102.651
Nam Cuoi	Nậm Cuổi	11	2099	Small-L	22.11199, 103.49353	22.112	103.494
Nam Gie	Nậm Giê or Nam Je or Nam De	4	2099	Small-S	22.3339, 103.66057	22.3339	103.661
Nam Han	Nậm Han	10	2099	Small-L	22.46633, 103.44648	22.4663	103.446
Nam Lan	Nậm Lằn	15	2099	Small-L	22.58068, 102.49842	22.5807	102.498
Nam Lang	Nậm Lang	12	2099	Small-L	22.96182, 105.26687	22.9618	105.267
Nam Long	Nam Long	9	2099	Small-S	12.3301442, 107.8627956	12.3301	107.863
Nam Lum 1	Nậm Lụm 1	9.2	2099	Small-S	22.62624, 103.38268	22.6262	103.383
Nam Lum 2	Nậm Lụm 2	18	2099	Small-L	22.62629, 103.38277	22.6263	103.383
Nam Ly 2	Nậm Ly 2	3	2099	Small-S	22.56001, 104.539	22.56	104.539
Nam Nghe	Nậm Nghẹ	7.5	2099	Small-S	22.4173, 102.95309	22.4173	102.953
Nam Nghe 1A	Nậm Nghẹ 1A	10	2099	Small-L	22.43135, 102.96159	22.4313	102.962
Nam Pac 1A	Nậm Pạc 1A	10	2099	Small-L	22.51493, 103.52718	22.5149	103.527
Nam Pan 5	Nậm Pàn 5	28	2099	Small-L	21.34689, 104.01402	21.3469	104.014
Nam Sai	Nậm Sài	19	2099	Small-L	22.26084, 103.96747	22.2608	103.967
Nam Si Luong 1	Nậm Sì Lường 1	30	2099	median	22.47259, 102.84626	22.4726	102.846
Nam Si Luong 1A	Nậm Sì Lường 1A	10	2099	Small-S	22.45393, 102.84219	22.4539	102.842
Nam Si Luong 3	Nậm Sì Lường 3	21	2099	Small-L	22.43969, 102.83389	22.4397	102.834
Nam Si Luong 4	Nậm Sì Lường 4	20	2099	Small-L	22.40482, 102.84793	22.4048	102.848
Nam So 1	Nậm So 1	12	2099	Small-L	22.47883, 103.43408	22.4788	103.434
Nam So 2	Nậm So 2	10	2099	Small-L	22.51984, 103.38717	22.5198	103.387
Nam Tang	Nậm Tăng	4.5	2099	Small-S	21.53886, 104.51287	21.5389	104.513
Nam Thi 2 - 2-3 tiers)	Nậm Thi 2	20	2099	Small-L	22.35324, 103.70453	22.3532	103.705
Nam Trai 4	Nậm Trai 4	12	2099	Small-L	21.65489, 103.9936	21.6549	103.994
Nam Vao 2	Nam Vao 2	8.6	2099	Small-S	15.01221, 108.25053	15.0122	108.251
Nam Xe 2	Nậm Xe 2	20	2099	Small-L	22.51228, 103.41553	22.5123	103.416
Nam Xi Lung 2	Nậm Xí Lùng 2	29	2099	Small-L	22.53108, 102.84297	22.4294	102.837
Nam Xi Lung 2A	Nậm Xí Lùng 2A	29	2099	Small-L	22.56308, 102.84203	22.3845	102.833
Ngoc Chien	Ngọc Chiến	5	2099	Small-S	21.58918, 104.19193	21.5892	104.192
Nuoc Buou	Nước Bươu	12.8	2099	Small-L	15.12045, 108.08942	15.1204	108.089
Nuoc Che	Nước Chè	30	2099	Medium	15.36519, 107.76781	15.3652	107.768
Nuoc Long	Nước Long	39	2099	Medium	14.7368546, 108.5575032	14.7369	108.558
Nuoc Long 1	Nước Long 1	3.2	2099	Small-S	14.7555791, 108.5222496	14.7556	108.522
Nuoc Long 2	Nước Long 2	6.4	2099	Small-S	14.75687, 108.5569752	14.7569	108.557
Pa Ha	Pa Hạ	28	2099	Small-L	22.47232, 102.84617	22.4723	102.846
Pa Tan 2	Pa Tần 2	20	2099	Small-L	22.4705, 103.19523	22.4705	103.195
Pa Vay Su	Pa Vây Sử	18	2099	Small-L	22.73325, 103.33455	22.7333	103.335
Pac Khuoi	Pác Khuổi	10	2099	Small-L	22.6143842, 106.2689839	22.6144	106.269
Phi Linh	Phi Lĩnh	16	2099	Small-L	21.78488, 102.95126	21.7849	102.951
Phieng Con	Phiêng Côn	10	2099	Small-L	21.10787, 104.39964	21.1078	104.4
Phong Quang	Phong Quang	18	2099	Small-L	22.88063, 104.90692	22.8806	104.907
Phu Tan 2	Phú Tân 2	93	2099	Medium	11.27934, 107.3279	11.2793	107.328
Sar Dueng 1	Sar Dueng 1	4	2099	Small-S	11.83053, 108.16362	11.8305	108.164
Sar Dueng 2	Sar Dueng 2	3	2099	Small-S	11.85408, 108.13214	11.8541	108.132
Son Tay	Sơn Tây	18	2099	Small-L	15.00811, 108.36032	15.0081	108.36
Song Cho 1	Sông Chò 1	7	2099	Small-S	12.44253, 108.9144	12.4425	108.914
Song Lien 1	Sông Liên 1	10	2099	Small-L	14.82759, 108.76995	14.8276	108.77
Song Lien 2	Sông Liên 2	10	2099	Small-L	14.70341, 108.72006	14.70341	108.72
Song Lo 3	Sông Lô 3	22	2099	Small-L	22.66059, 104.99469	22.6606	104.995
Song Lo 5	Sông Lô 5	29.7	2099	Small-L	22.44282, 104.91527	22.4428	104.915
Song Ma 2	Sông Mã 2	21	2099	Small-L	21.1662, 103.28712	21.1662	103.287
Song Ma 3	Sông Mã 3	29.5	2099	Small-L	21.231, 103.31198	21.231	103.312
Song Nhiem 3	Sông Nhiệm 3	14.2	2099	Small-L	23.04076, 105.41015	23.0408	105.41
Suoi Choang	Suối Choang	4	2099	Small-S	19.07232, 104.74526	19.0723	104.745
Suoi Chut 1	Suối Chút 1	7	2099	Small-S	22.05878, 104.20088	22.0588	104.201
Suoi Chut 2	Suối Chút 2	5	2099	Small-S	22.06032, 104.1995	22.0603	104.2
Suoi Sap 2A	Suối Sập 2A	49.6	2099	Medium	21.2306, 104.50418	21.2306	104.504
Suoi Tan 2	Suối Tân 2	5.5	2099	Small-S	20.8346156, 104.8126309	20.8346	104.813
Ta Pao Ho	Tà Páo Hồ	12	2099	Small-L	22.73276, 103.33267	22.7328	103.333
Ta Pao Ho 1A	Tà Páo Hồ 1A	8	2099	Small-S	22.77979, 103.34128	22.7798	103.341
Ta Pao Ho 1B	Tà Páo Hồ 1B	12	2099	Small-L	22.73978, 103.33315	22.7398	103.333
Ta Quan 1	Tả Quan 1	3.2	2099	Small-S	22.6161, 104.74025	22.6161	104.74
Tam Phuc	Tầm Phục	5	2099	Small-S	15.69915, 107.96542	15.6991	107.965
Tan My 2	Tân Mỹ 2	14	2099	Small-L	11.7823, 108.80257	11.7823	108.803
Tan Thuong	Tân Thượng	27	2099	Small-L	11.73582, 108.00369	11.7358	108.004
Thac Ba 2	Thác Bà 2	18.9	2099	Small-L	21.72314, 105.08175	21.7231	105.082
Thach Nam	Thạch Nham	10	2099	Small-S	15.1197, 108.62016	15.1197	108.62
Thuang Dak Psi - Aux	Thượng Đăk Psi - Aux	6.6	2099	Small-S	14.86084, 108.04371	14.8608	108.044
Thuong Dak Psi - Main	Thượng Đăk Psi - Main	6.6	2099	Small-S	14.82927, 108.04054	14.8293	108.041
Thuong Son Tay	Thượng Sơn Tây	10	2099	Small-L	15.02309, 108.3205	15.0231	108.32
Tra Khuc 1	Trà Khúc 1	30	2099	Medium	15.01249, 108.52559	15.0125	108.526
Tra Linh 2	Trà Linh 2	18	2020	Small-L	15.04344, 108.03594	15.0434	108.036
Tra Phong A	Trà Phong A	20	2099	Small-L	15.16697, 108.32451	15.167	108.325
Tra Phong B	Trà Phong B	10	2099	Small-L	5.15617, 108.34358	5.15617	108.344
Tran Con	Phiêng Côn	10	2099	Small-L	21.10787, 104.39964	21.1079	104.4
Trang Dinh 2	Tràng Định 2	29.8	2099	Small-L	22.19828, 106.65234	22.1983	106.652
Tr'Hy	Tr'Hy	30	2099	Medium	15.80162, 107.35617	15.8016	107.356
Tri An expansion	Trị An	200	2099	Large	11.10593, 106.9845	11.1059	106.984
Tu Tren	Tu Trên	10	2099	Small-L	22.053, 104.02261	22.053	104.023
Vang Ma Chai	Vàng Ma Chải	5	2099	Small-S	22.69785, 103.33819	22.6978	103.338
Vang Ma Chai 1	Vàng Ma Chải 1	5	2099	Small-S	22.72074, 103.31473	22.7207	103.315
Vang Ma Chai 2	Vàng Ma Chải 2	19	2099	Small-L	22.69302, 103.32973	22.693	103.33
Xuan Minh HG	Xuân Minh HG	10.5	2099	Small-L	22.48585, 104.7351	22.4858	104.735
Yen Son	Yên Sơn	90	2099	Medium	21.99679, 105.2171	21.9968	105.217

## Sheet: Cannot locate
Name (English)	Name (Vietnamese	Peak Installed Capacity (MW)	Year	Class	Latitude, Longitude	Latitude	Longitude		See associated Supplement File "Notes" for clarifications
Phin Ho	Phìn Hồ	10	3099	<= Small	21.70705, 104.03045	21.707	104.03
Nam Tha Ha	Nậm Tha Hạ	10	3099	<= Small	21.93511, 104.3891	21.9351	104.389
Mi Hang Tau	Mí Háng Tầu	10	3099	<= Small	21.67237, 104.17518	21.6724	104.175
Suoi Linh	Suối Lĩnh	10	3099	<= Small	22.10217, 103.88122	22.1022	103.881
Hong Ngai	Hồng Ngài	10	3099	<= Small	21.18995, 104.48397	21.1899	104.484
Nam Xe 2A	Nậm Xe 2A	10	3099	<= Small	22.50064, 103.41896	22.5006	103.419
Pa Tan 1	Pa Tần 1	10	3099	<= Small	22.48488, 103.1596	22.4849	103.16
Phieng Luc	Phiêng Lúc	10	3099	<= Small	22.17778, 103.70357	22.1778	103.704
Quang Nguyen	Quảng Nguyên	10	3099	<= Small	22.5780794, 104.5797769	22.5781	104.58
Suoi Chung	Suối Chùng	10	3099	<= Small	22.49543, 104.66664	22.4954	104.667
Tan Lap	Tân Lập	10	3099	<= Small	22.52138, 104.82211	22.5214	104.822
Dak Uy	Đak Uy	10	3099	<= Small	14.541, 107.96982	14.541	107.97
Da Klong	Đa Klong	10	3099	<= Small	11.90827, 107.76918	11.9083	107.769
Nam Xe 1	Nậm Xe 1	10	3099	<= Small	22.51618, 103.45984	22.5162	103.46
Nam La - Ha Giang	Nậm Là - Hà Giang	10	3099	<= Small	22.57517, 104.58659	22.57517 22.57517	104.587
Van Ho - Nam Xe	Van Hồ - Nậm Xe	10	3099	<= Small	22.48379, 103.4755	22.4838	103.475
Nam Cat - Hoang Then	Nậm Cát - Hoang Thèn	10	3099	<= Small	22.56075, 103.32255	22.5607	103.323
